# Supplementary material
Source: PubMed Central journal article supplement (PMC4862943)
Supplement: NIHMS740073-supplement-2.pdf [file NIHMS740073-supplement-2.pdf]

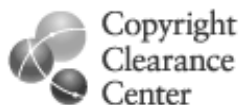

RightsLink®

Home

Account  
Info

Help

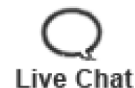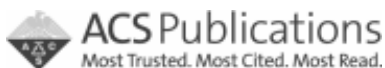**Title:** Near-Infrared Emitting Polymer  
Nanogels for Efficient Sentinel  
Lymph Node Mapping**Author:** Young-Woock Noh, Seong-Ho  
Kong, Doo-Yeol Choi, et al**Publication:** ACS Nano**Publisher:** American Chemical Society**Date:** Sep 1, 2012

Copyright © 2012, American Chemical Society

Logged in as:

kruti soni

Account #:

3000943805

LOGOUT

**PERMISSION/LICENSE IS GRANTED FOR YOUR ORDER AT NO CHARGE**

This type of permission/license, instead of the standard Terms & Conditions, is sent to you because no fee is being charged for your order. Please note the following:

- Permission is granted for your request in both print and electronic formats, and translations.
- If figures and/or tables were requested, they may be adapted or used in part.
- Please print this page for your records and send a copy of it to your publisher/graduate school.
- Appropriate credit for the requested material should be given as follows: "Reprinted (adapted) with permission from (COMPLETE REFERENCE CITATION). Copyright (YEAR) American Chemical Society." Insert appropriate information in place of the capitalized words.
- One-time permission is granted only for the use specified in your request. No additional uses are granted (such as derivative works or other editions). For any other uses, please submit a new request.

If credit is given to another source for the material you requested, permission must be obtained from that source.

BACK

CLOSE WINDOW

Copyright © 2015 [Copyright Clearance Center, Inc.](#) All Rights Reserved. [Privacy statement](#). [Terms and Conditions](#).

Comments? We would like to hear from you. E-mail us at [customercare@copyright.com](mailto:customercare@copyright.com)
